# Supplementary material
Source: publisher site journal article supplement (https://www.dovepress.com/article/243549)
Supplement: Supplementary file 1 [file get_supplementary_file.php]

## Supplementary Figure

### Supplementary Figure 1

A

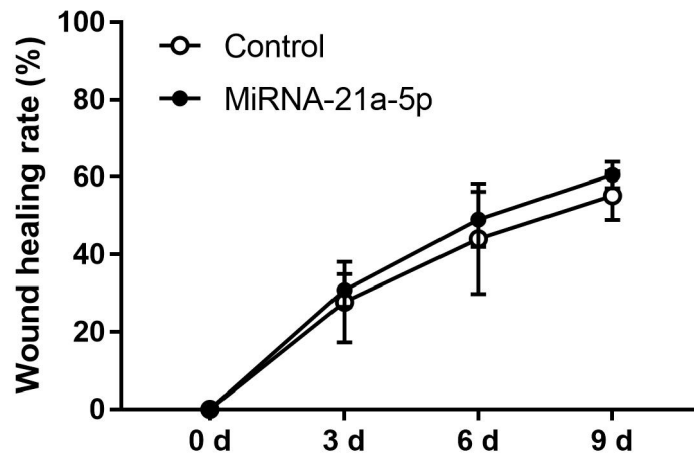

B

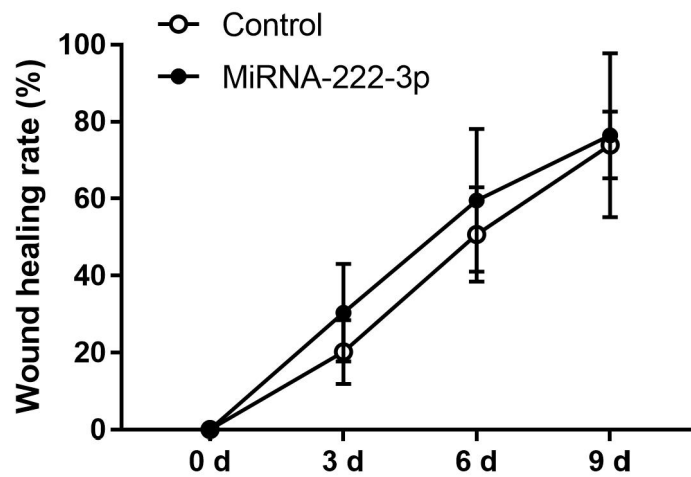

Supplementary Figure 1. Effect of miRNA-21a-5p or miRNA-222-3p on skin wound healing in normal mice.

Wound healing rate in normal mice treated with miRNA-21a-5p (A, 0.5  $\mu\text{mol/L}$ ) or

miRNA-222-3p (B, 0.5  $\mu\text{mol/L}$ ) for 9 days (n = 3).

## Supplementary Figure 2

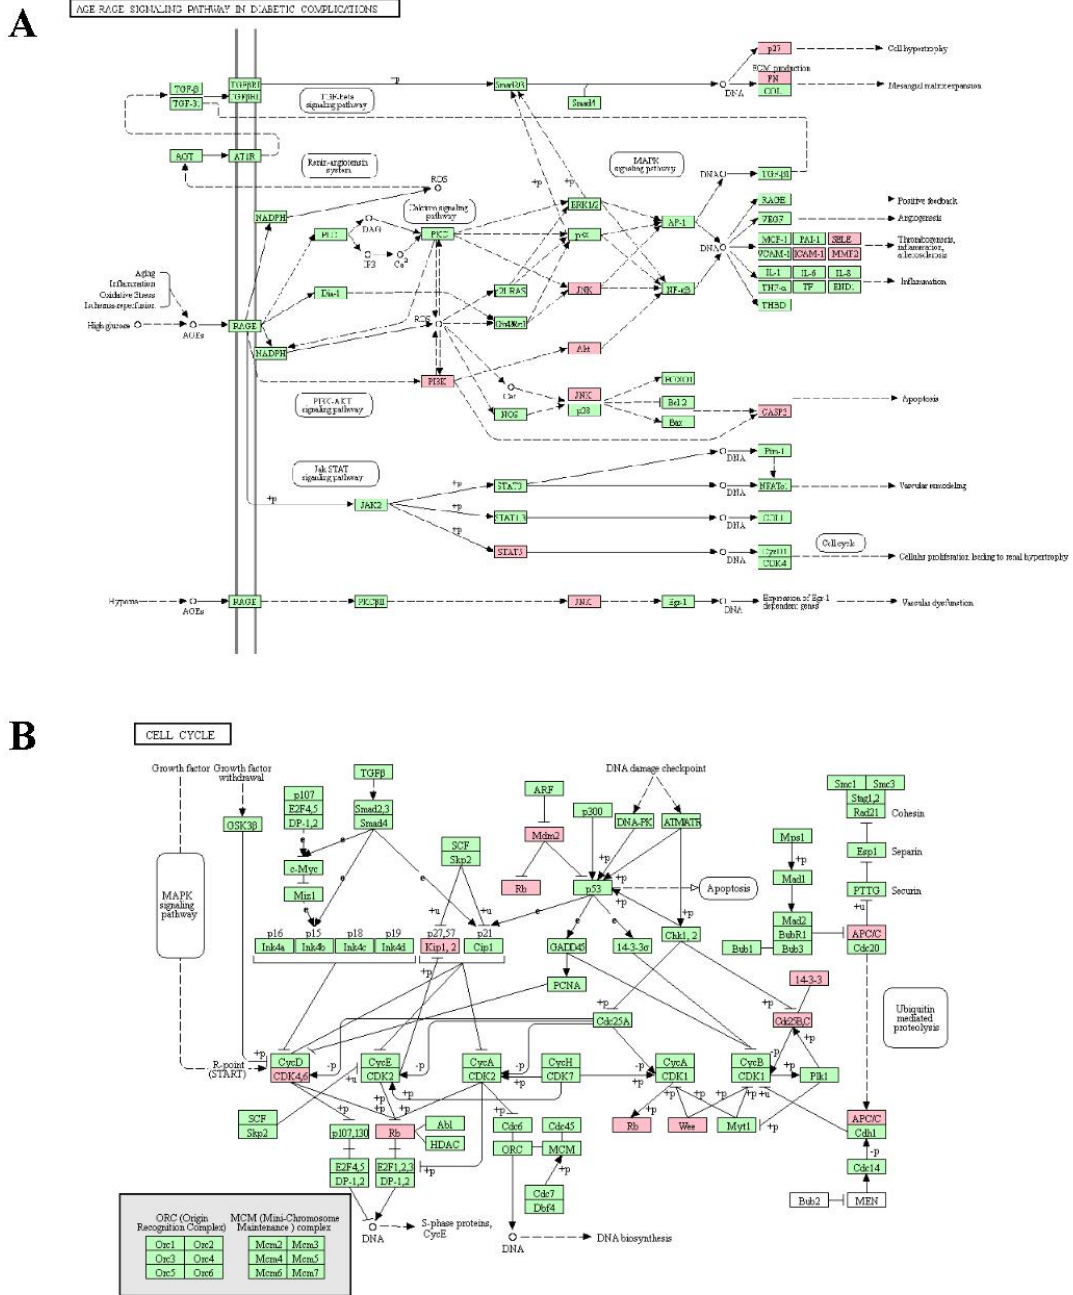

Supplementary Figure 2. Kyoto Encyclopedia of Genes and Genomes (KEGG)

enrichment analysis for target genes of miRNA-221-3p.

(A) The KEGG enrichment analysis showing that the target genes of miRNA-221-3p

involved in the AGE-RAGE signaling pathway in diabetic complications, downregulating the expression levels of p27, CASP3, SELE, JNK and other proteins.

(B) The KEGG enrichment analysis showing that the target genes of miRNA-221-3p involved in the cell cycle signaling pathway, downregulating the expression of the cyclin-dependent kinase inhibitors p27 and p57.
